# Supplementary material for: A Longitudinal Study of the Feline Faecal Microbiome Identifies Changes into Early Adulthood Irrespective of Sexual Development
Source: PubMed Central journal article supplement (PMC4682054; doi:10.1371/journal.pone.0144881), 2015-12-14

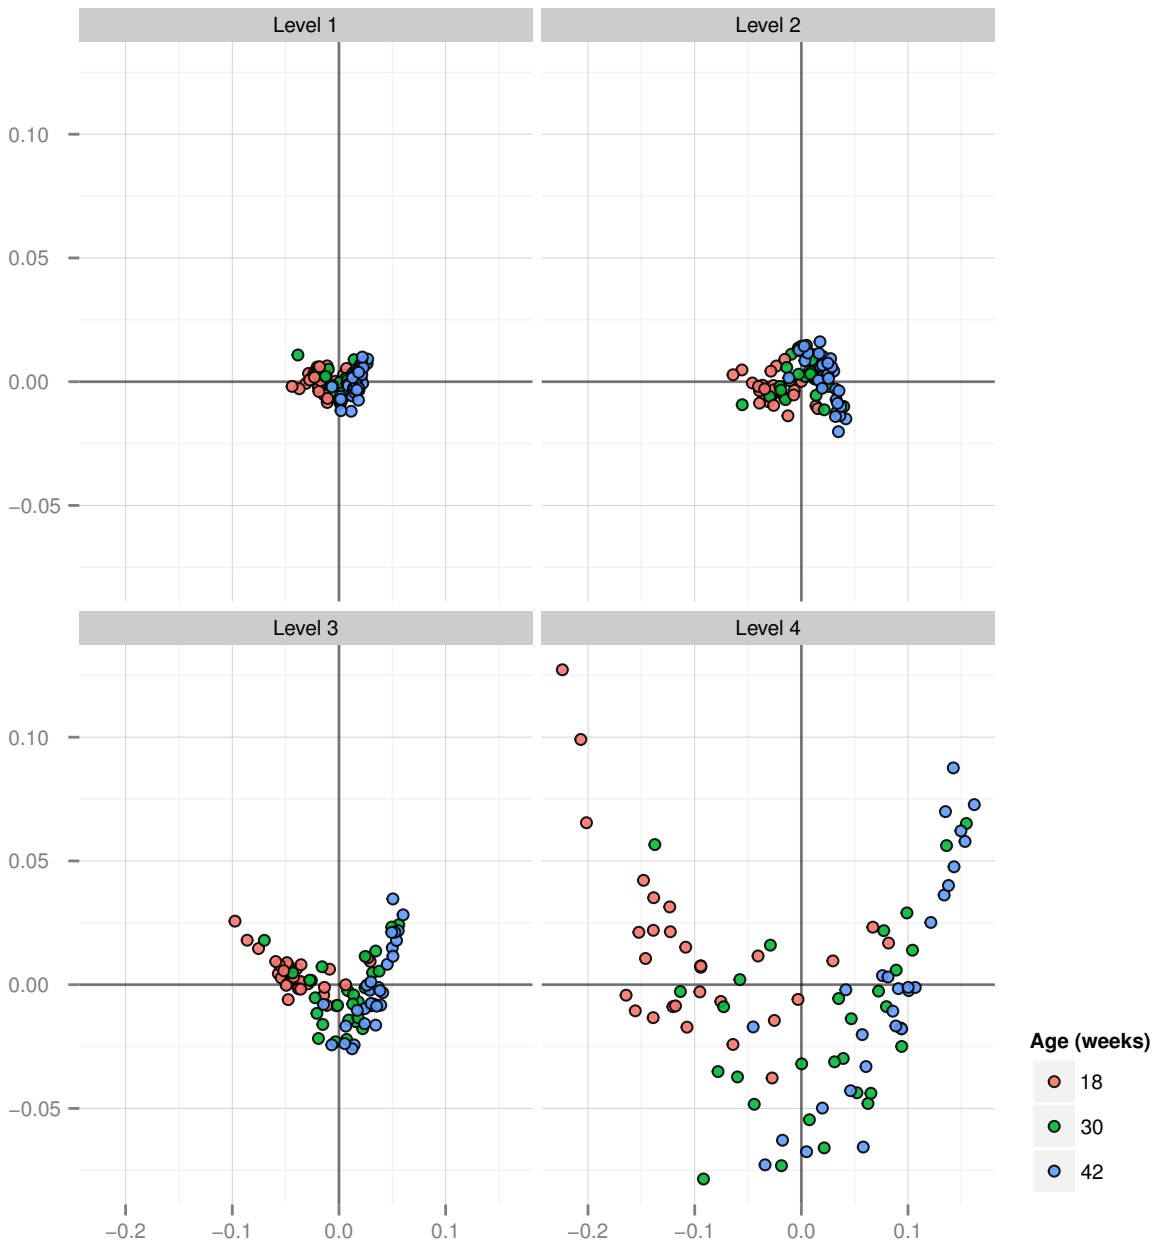

Supplement: pone.0144881.s003.pdf [file pone.0144881.s003.pdf]
